# Supplementary material
Source: Springer Nature journal article supplement (https://www.springermedizin.de/resource/supplementary/12967_2009_355_MOESM7_ESM.pdf/9576290)

**1B1**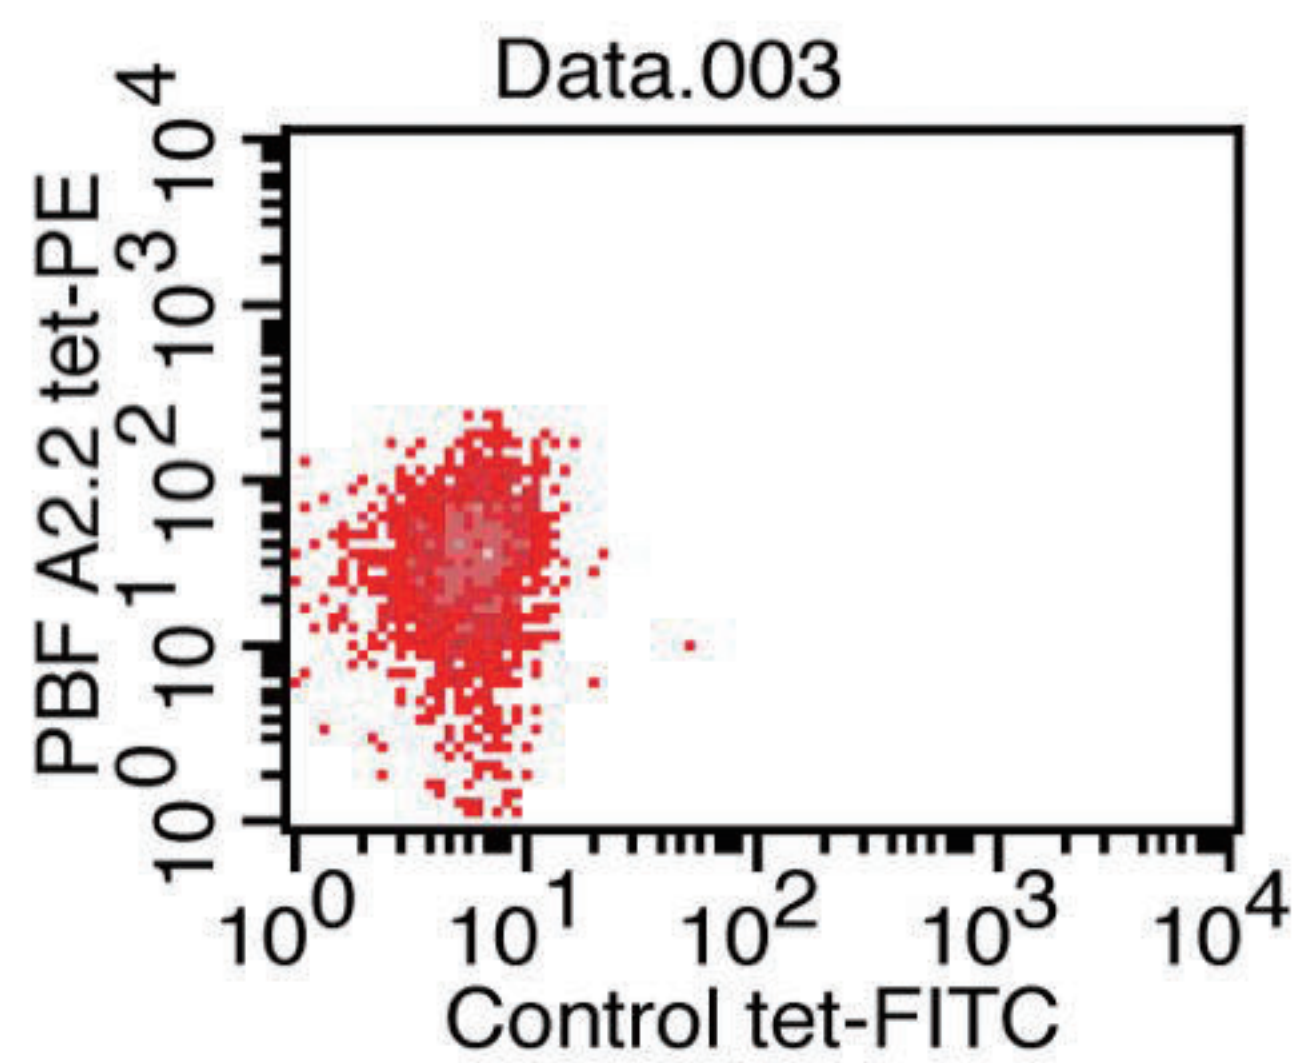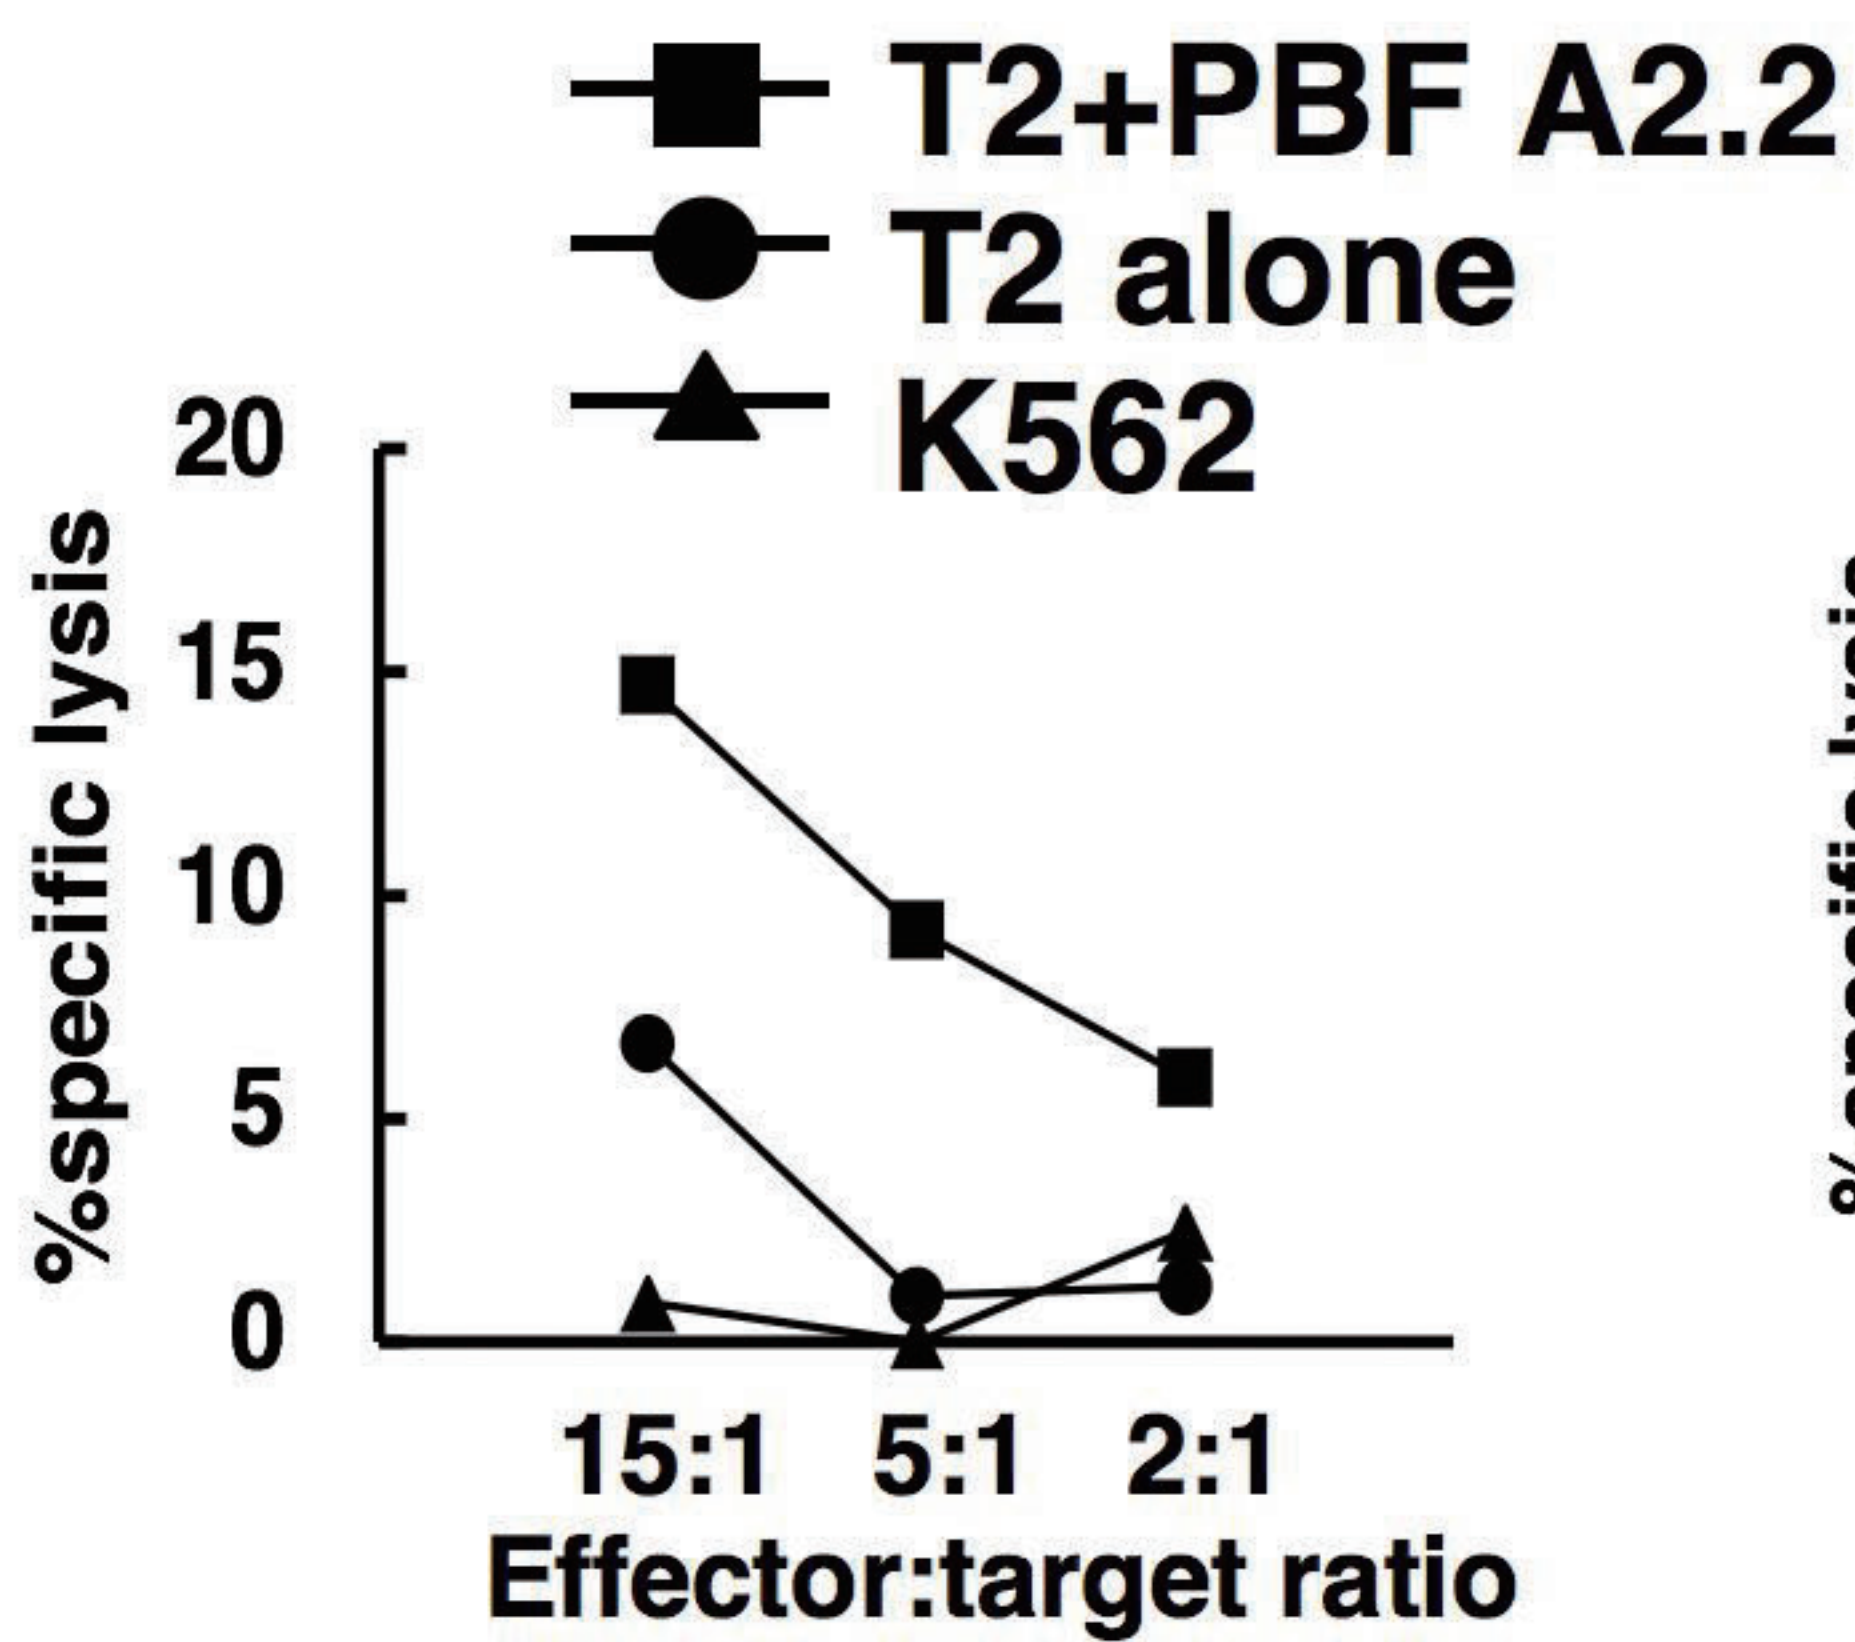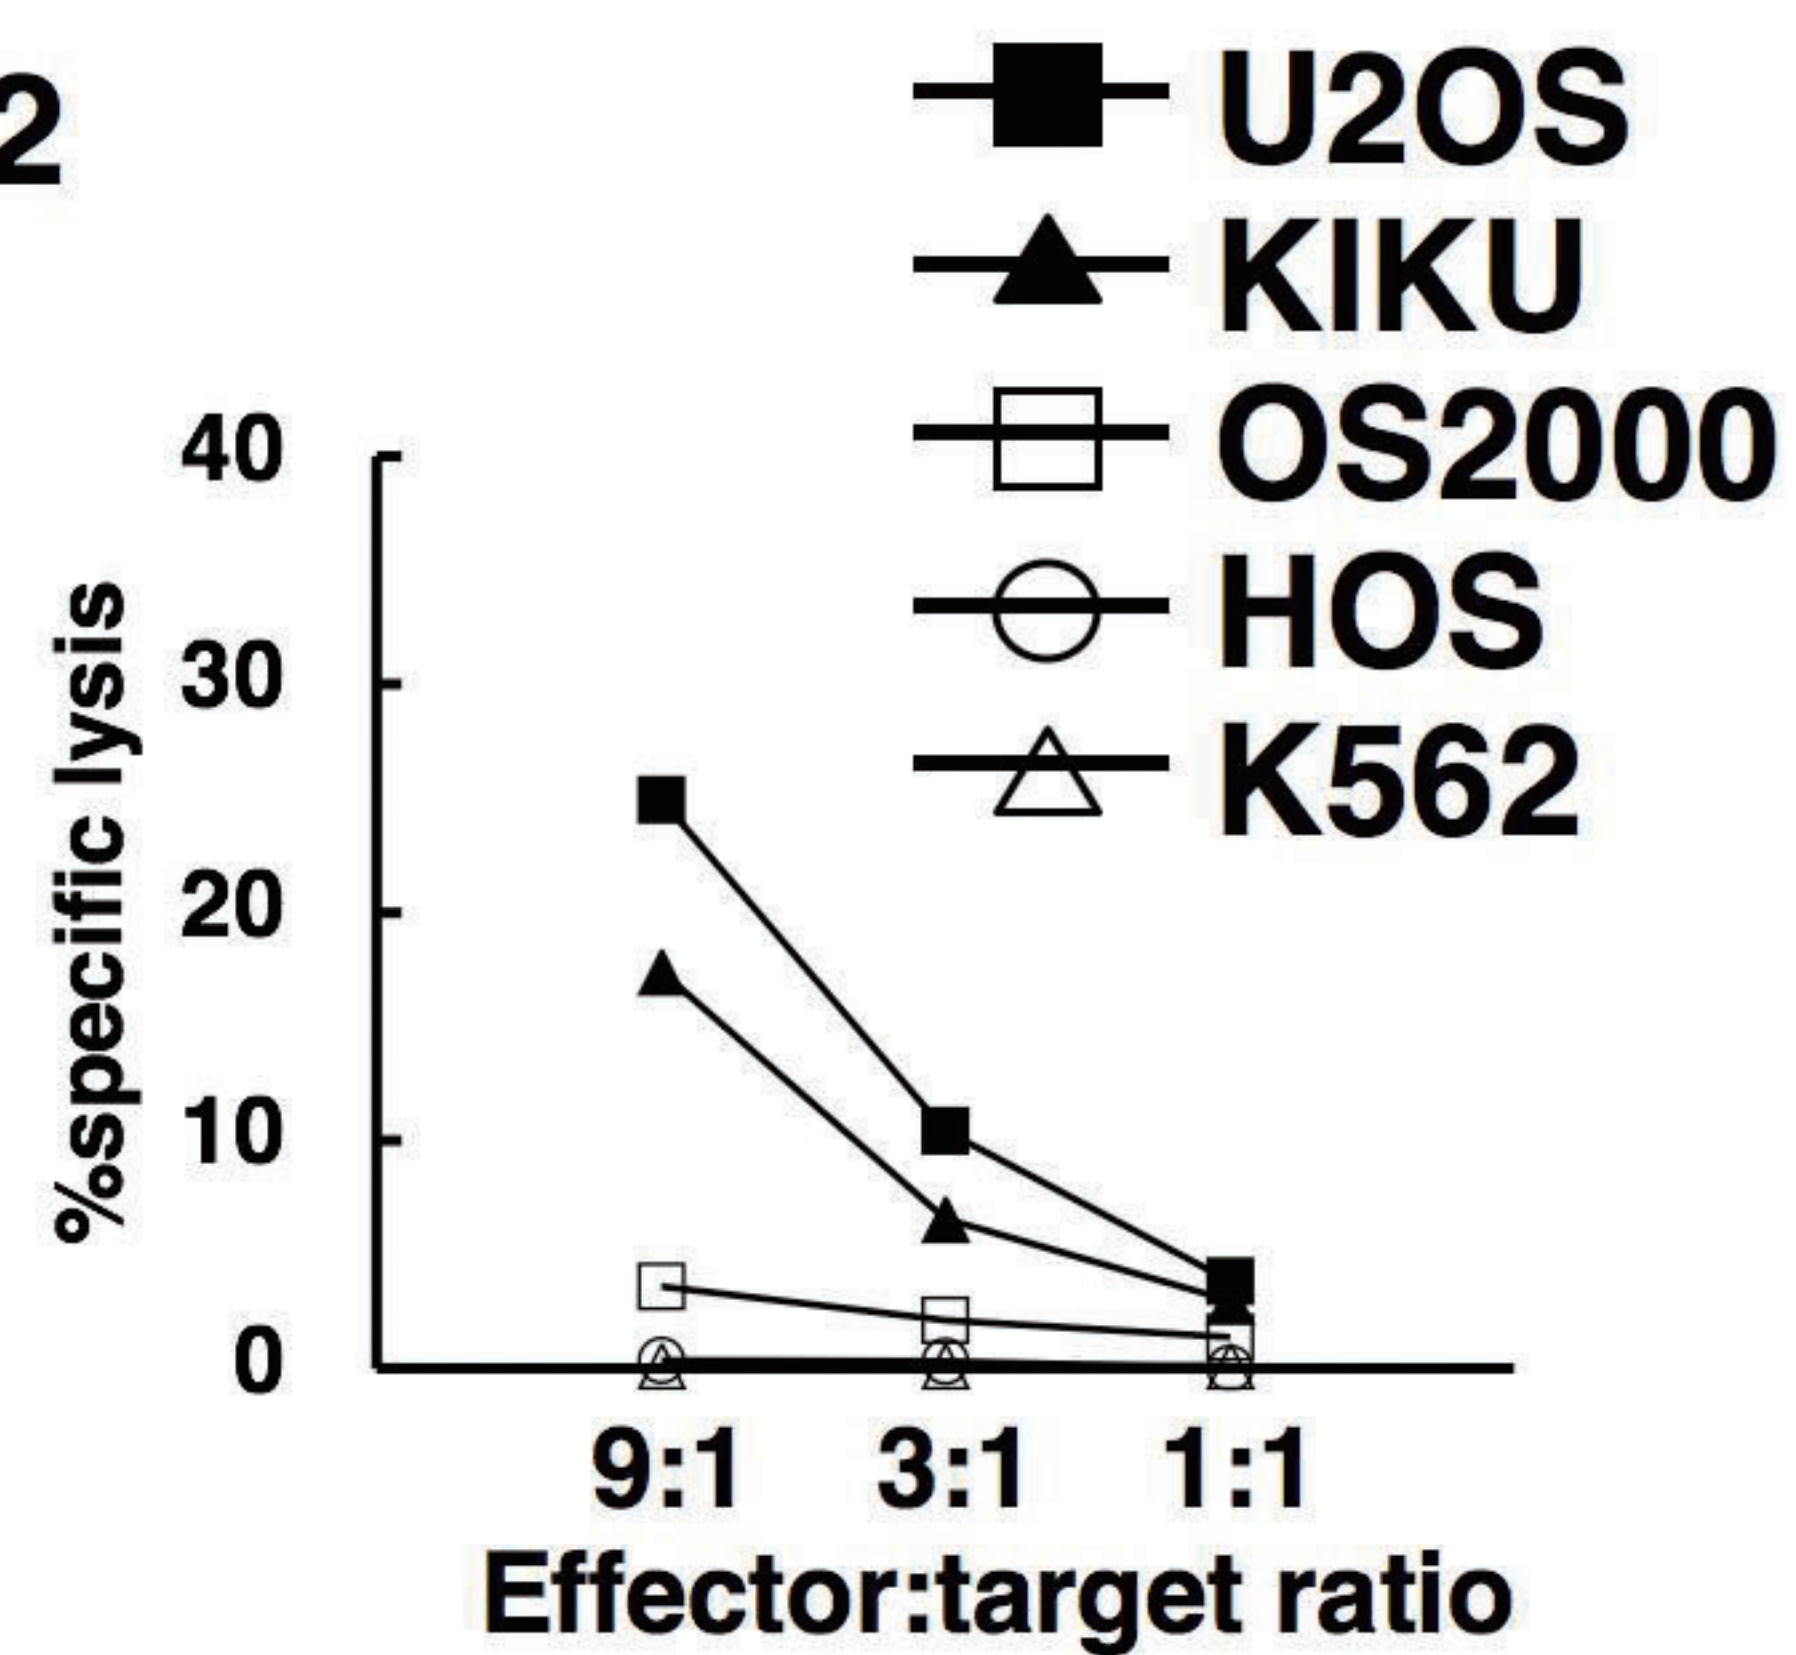**1E1**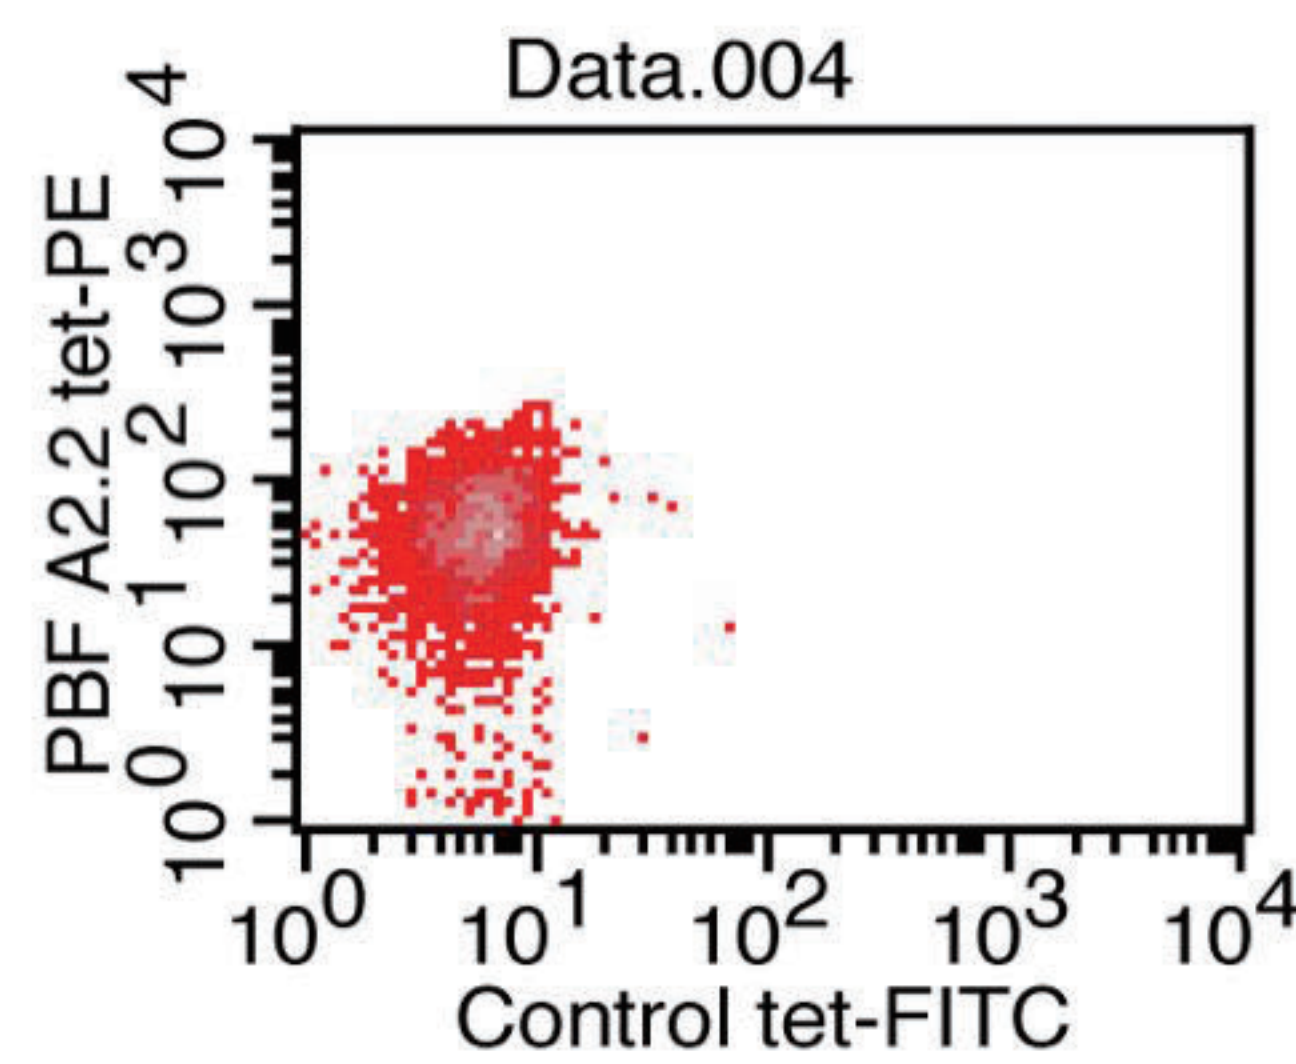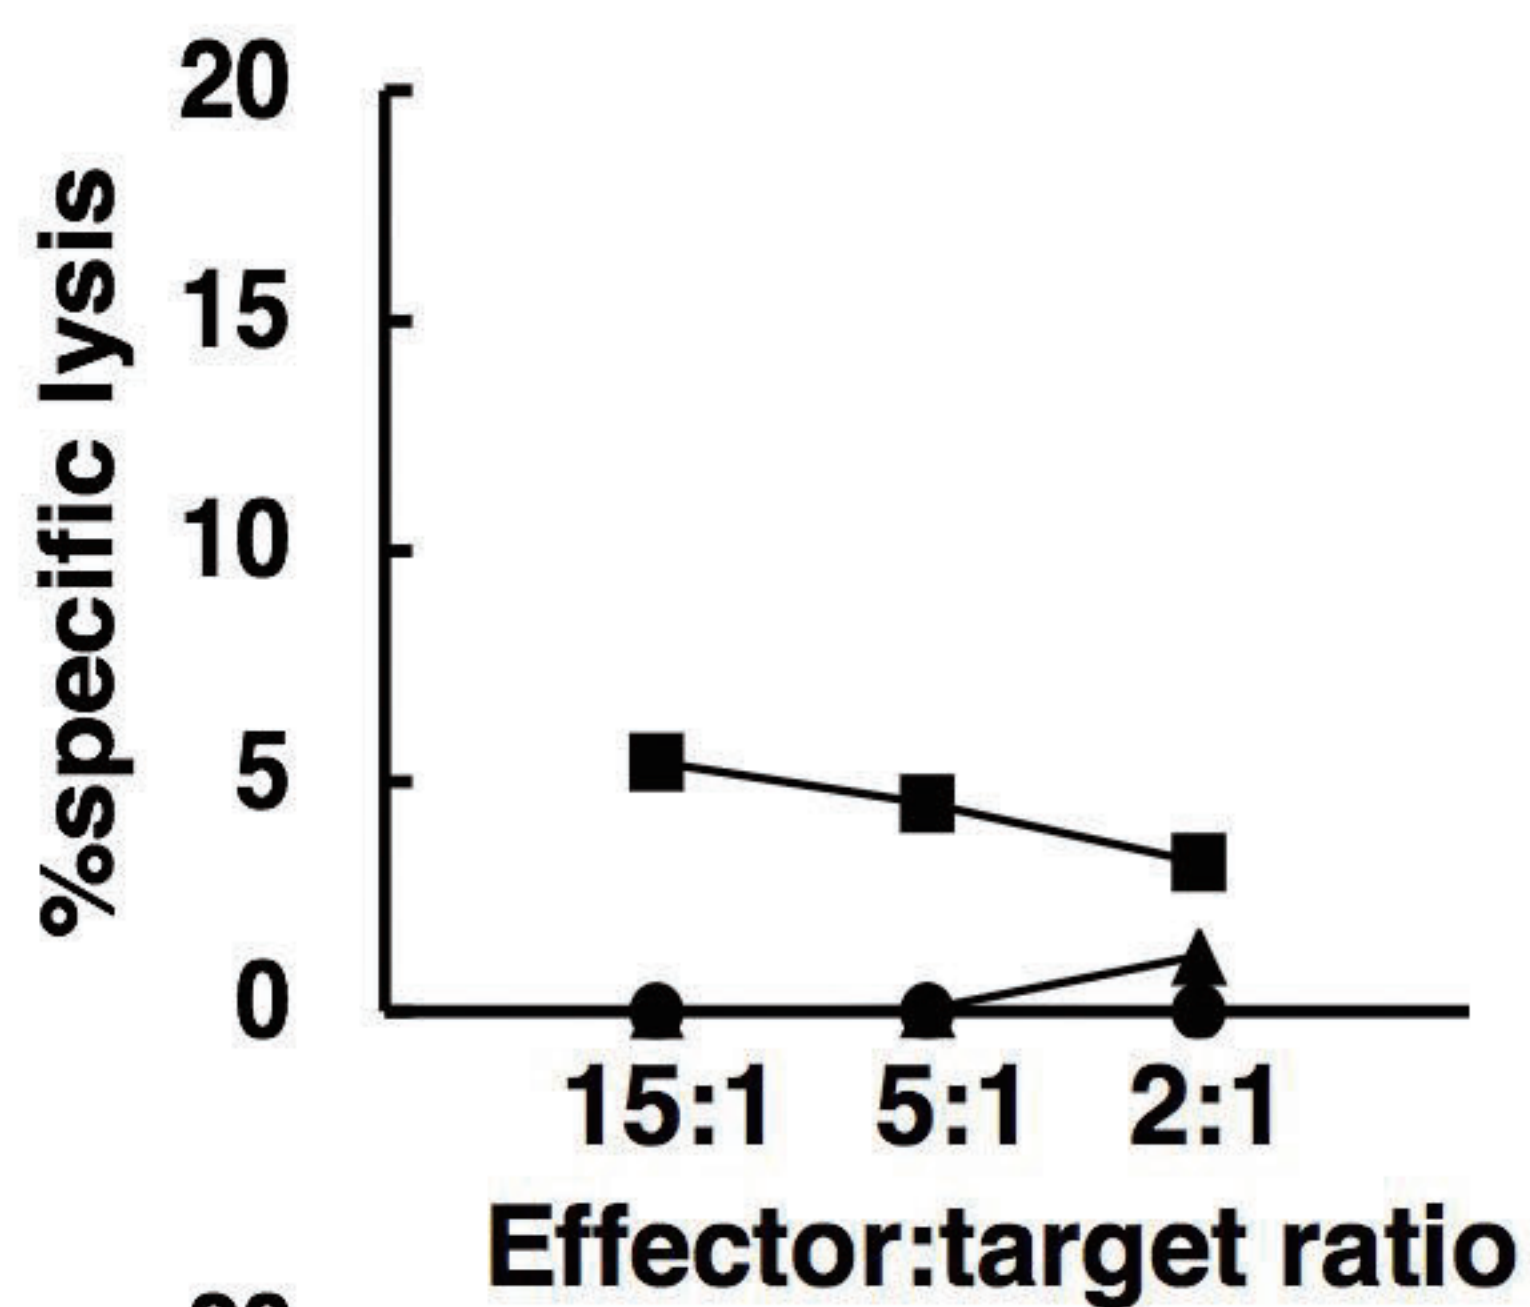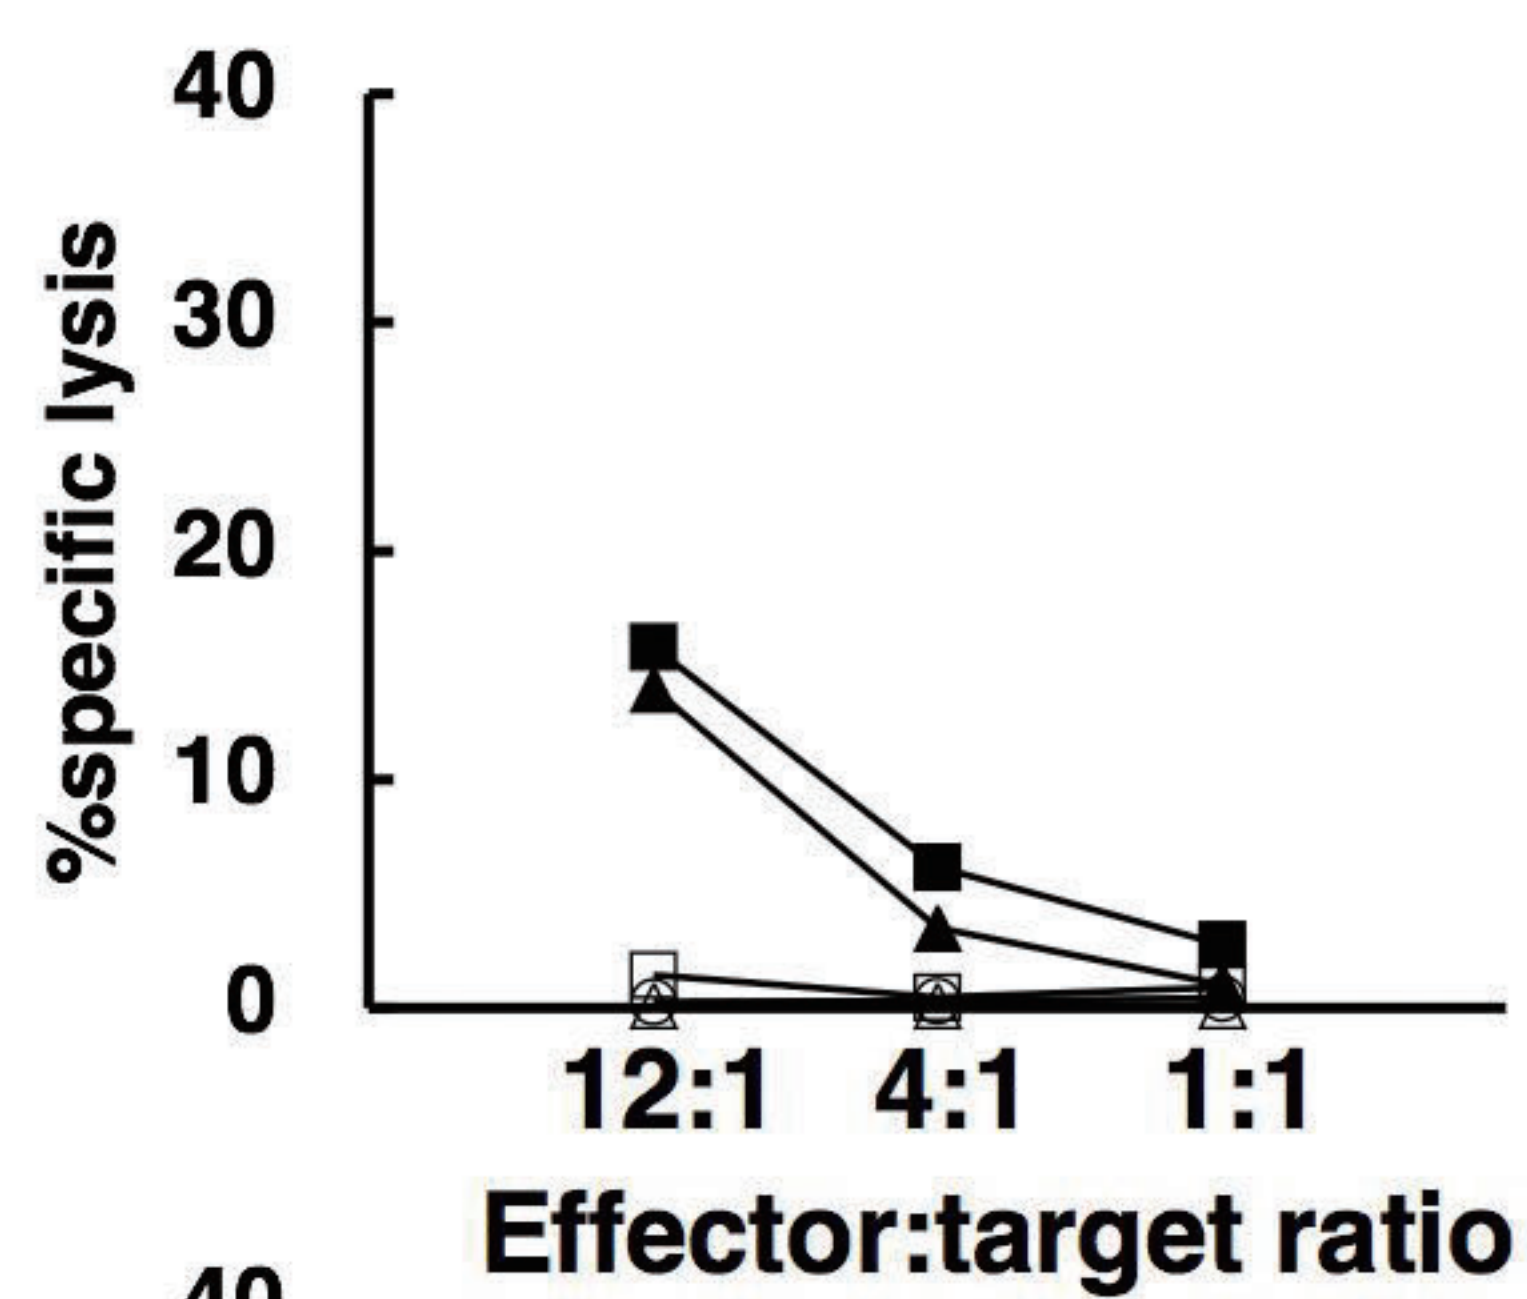**1F4**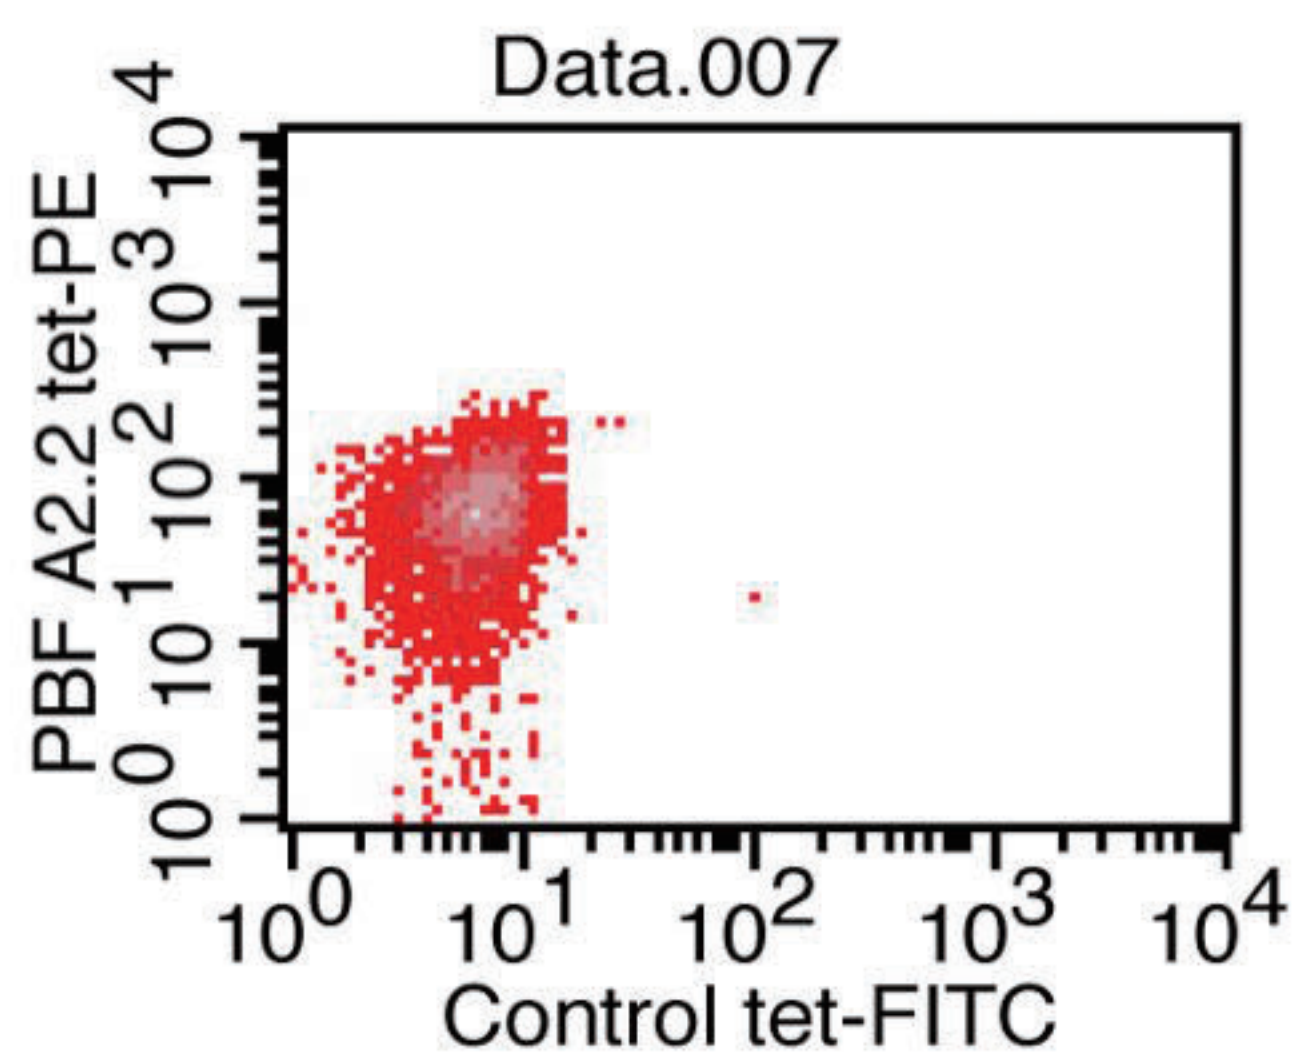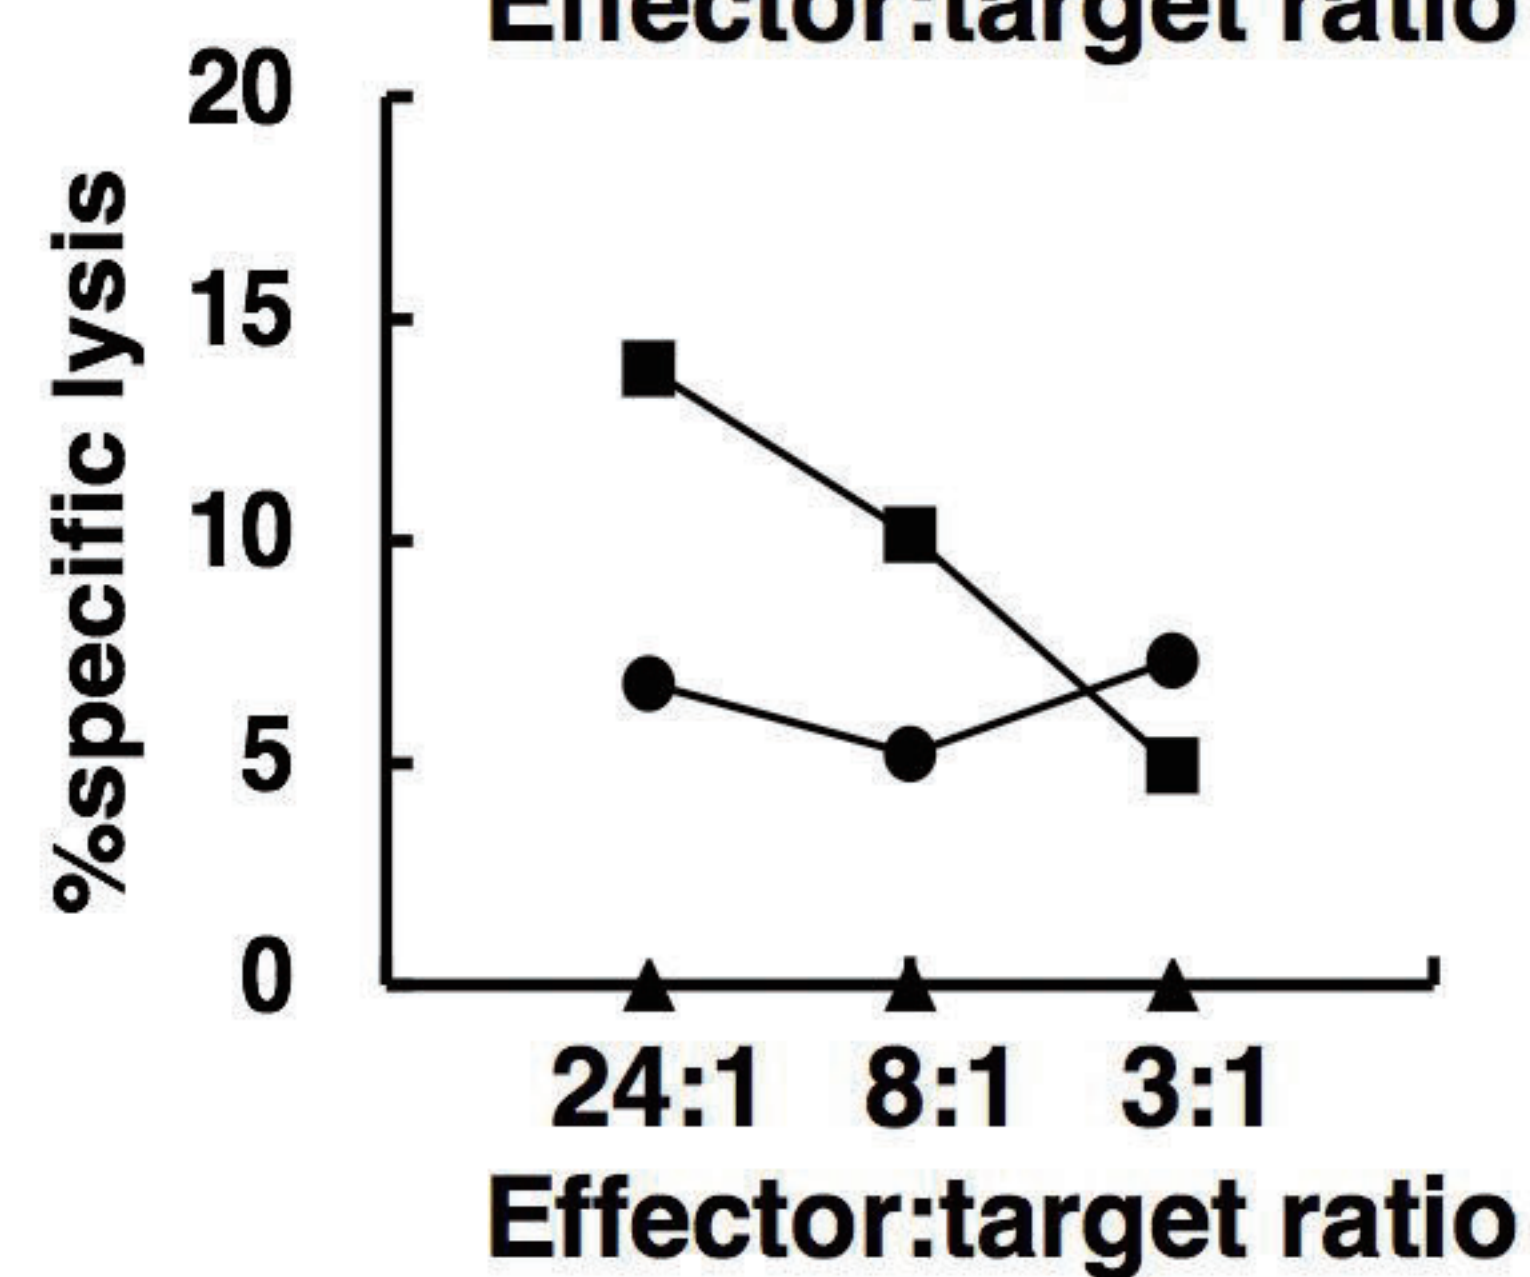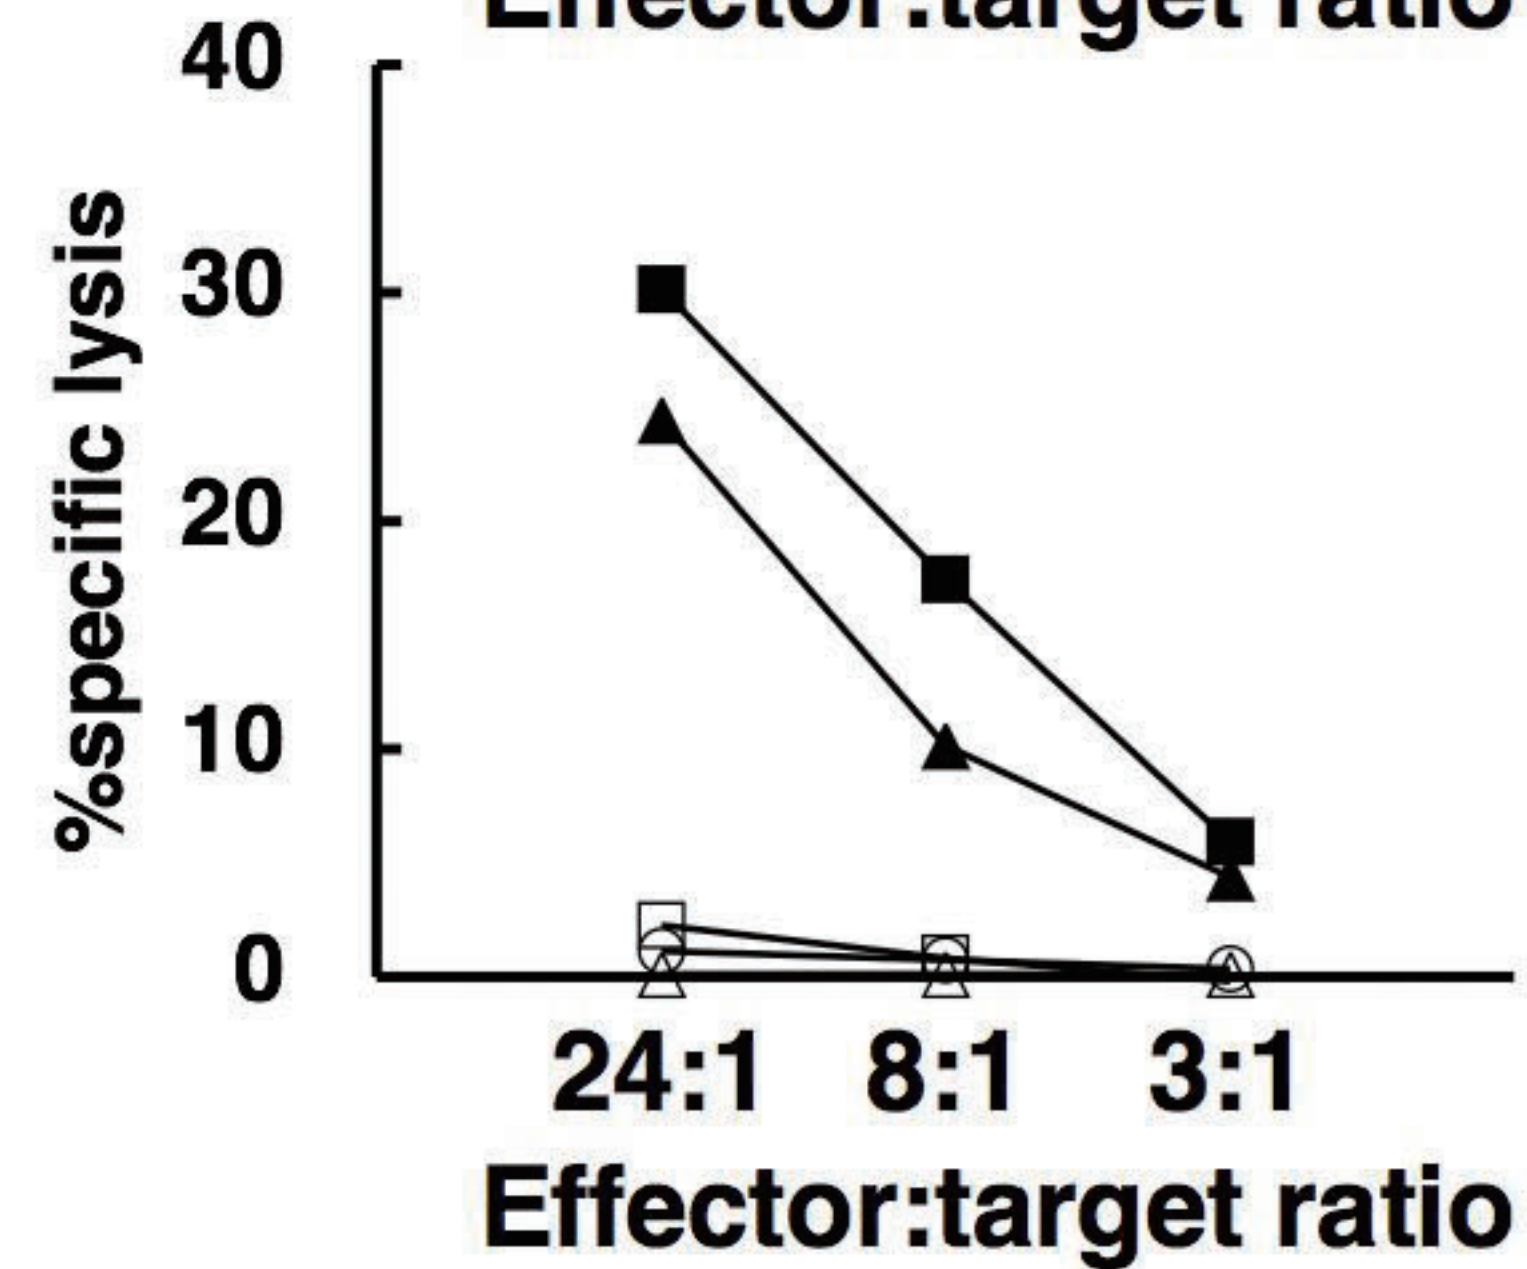**1D7**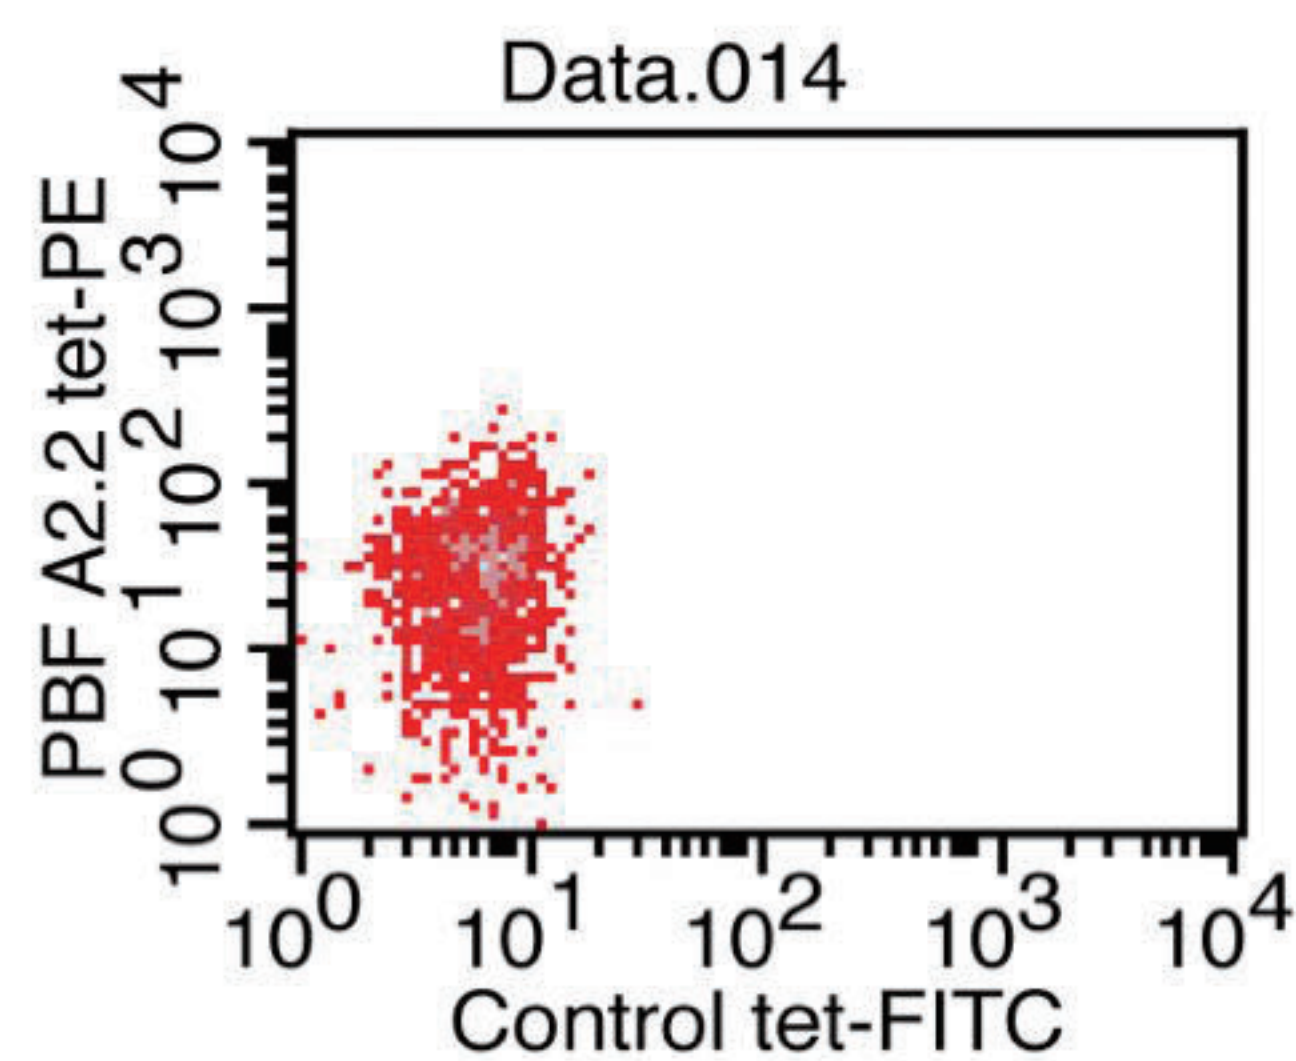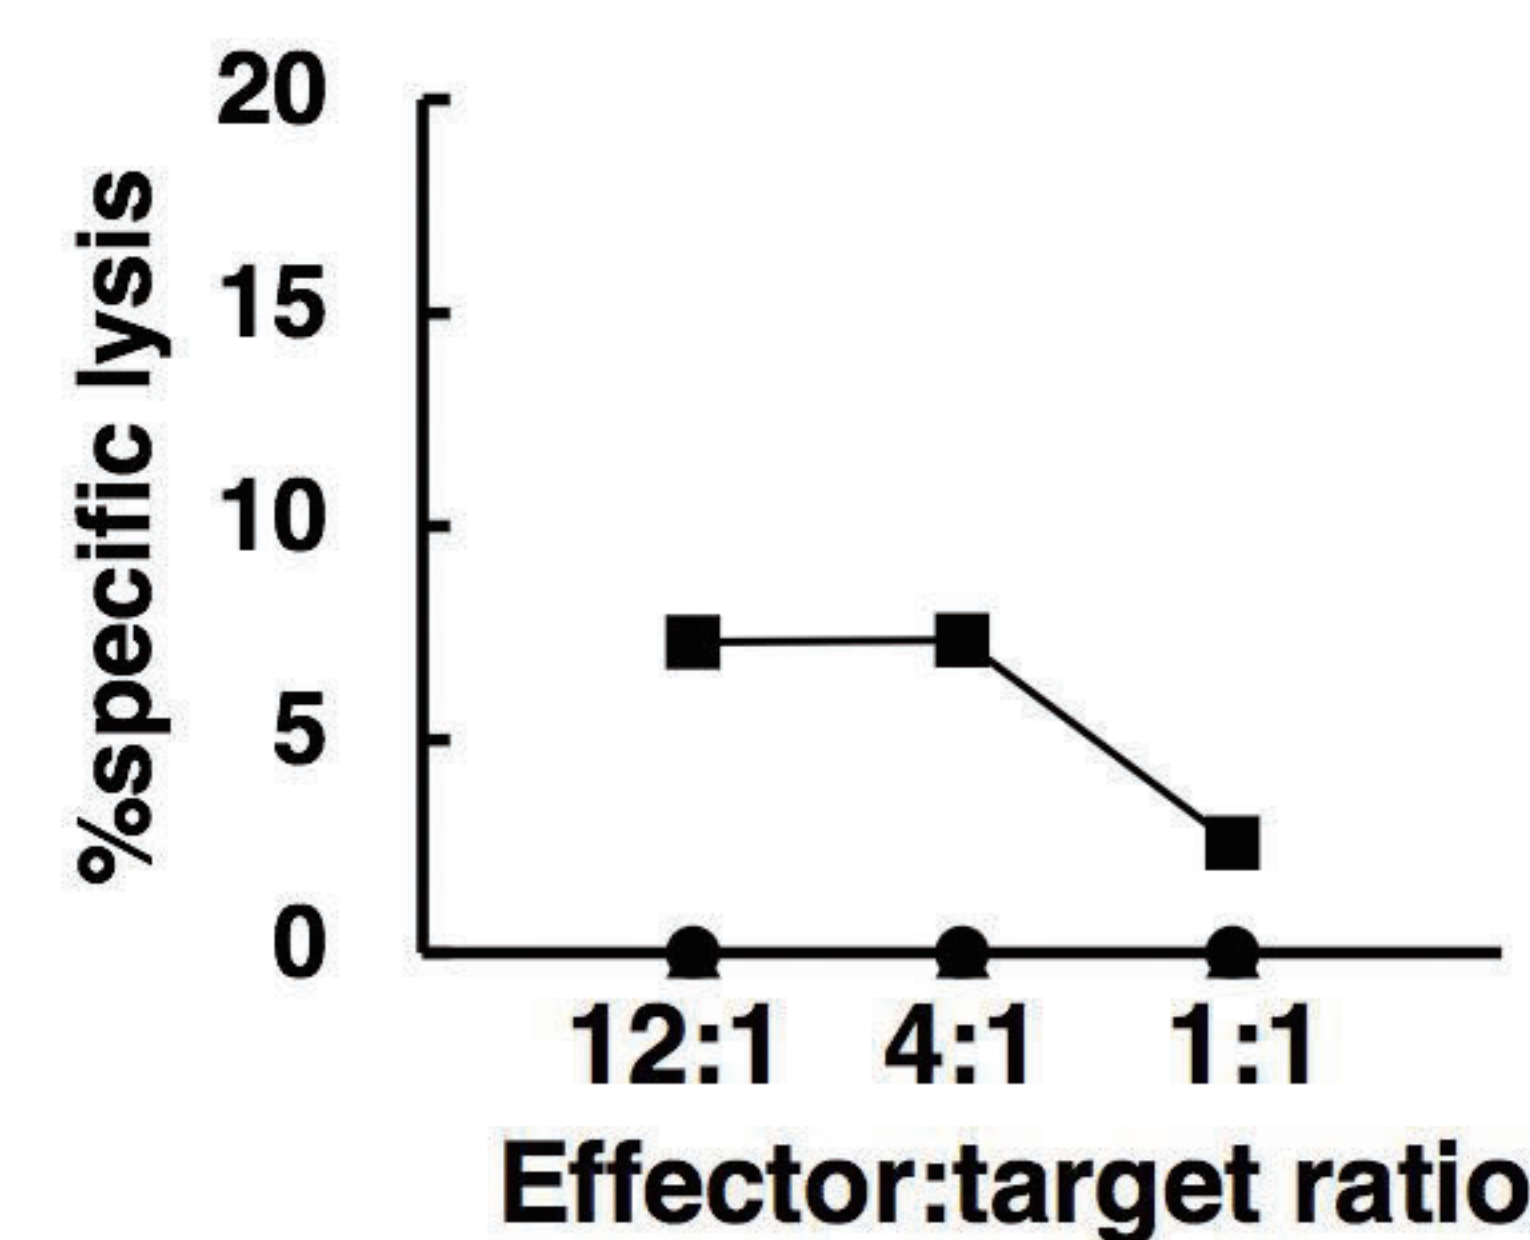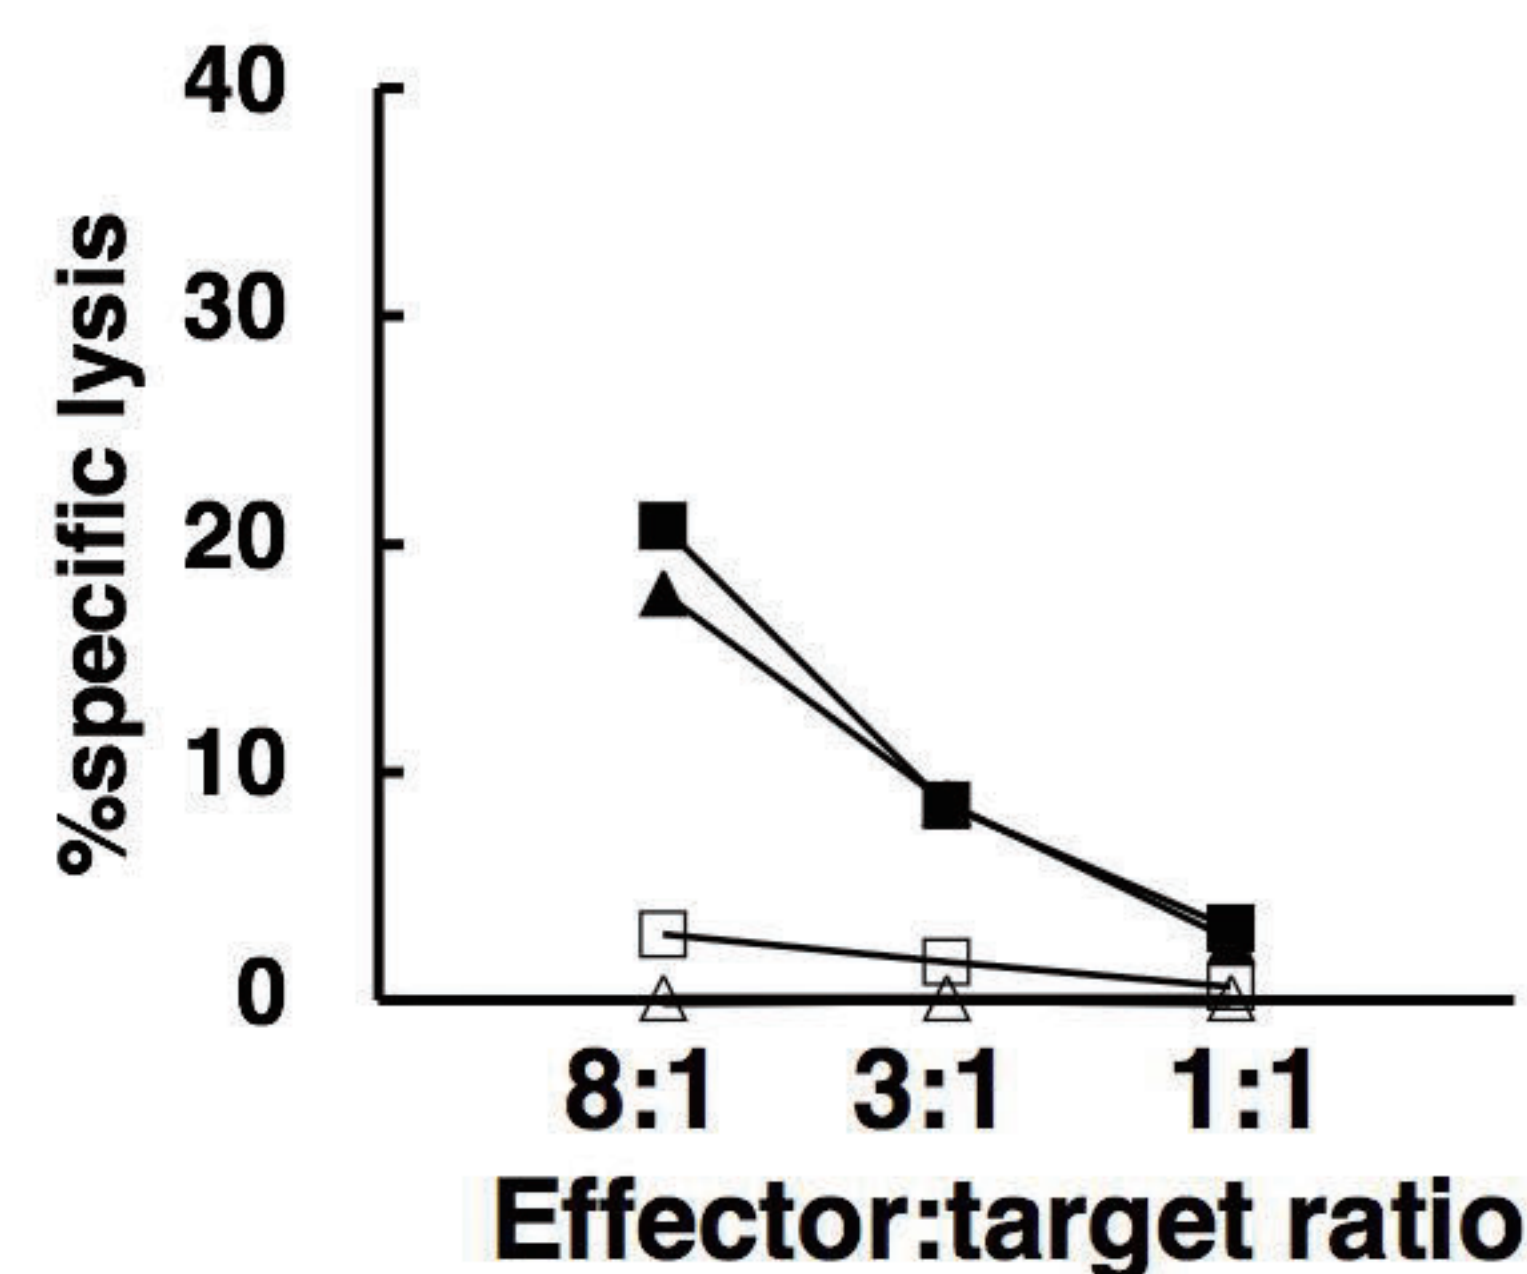**1F7**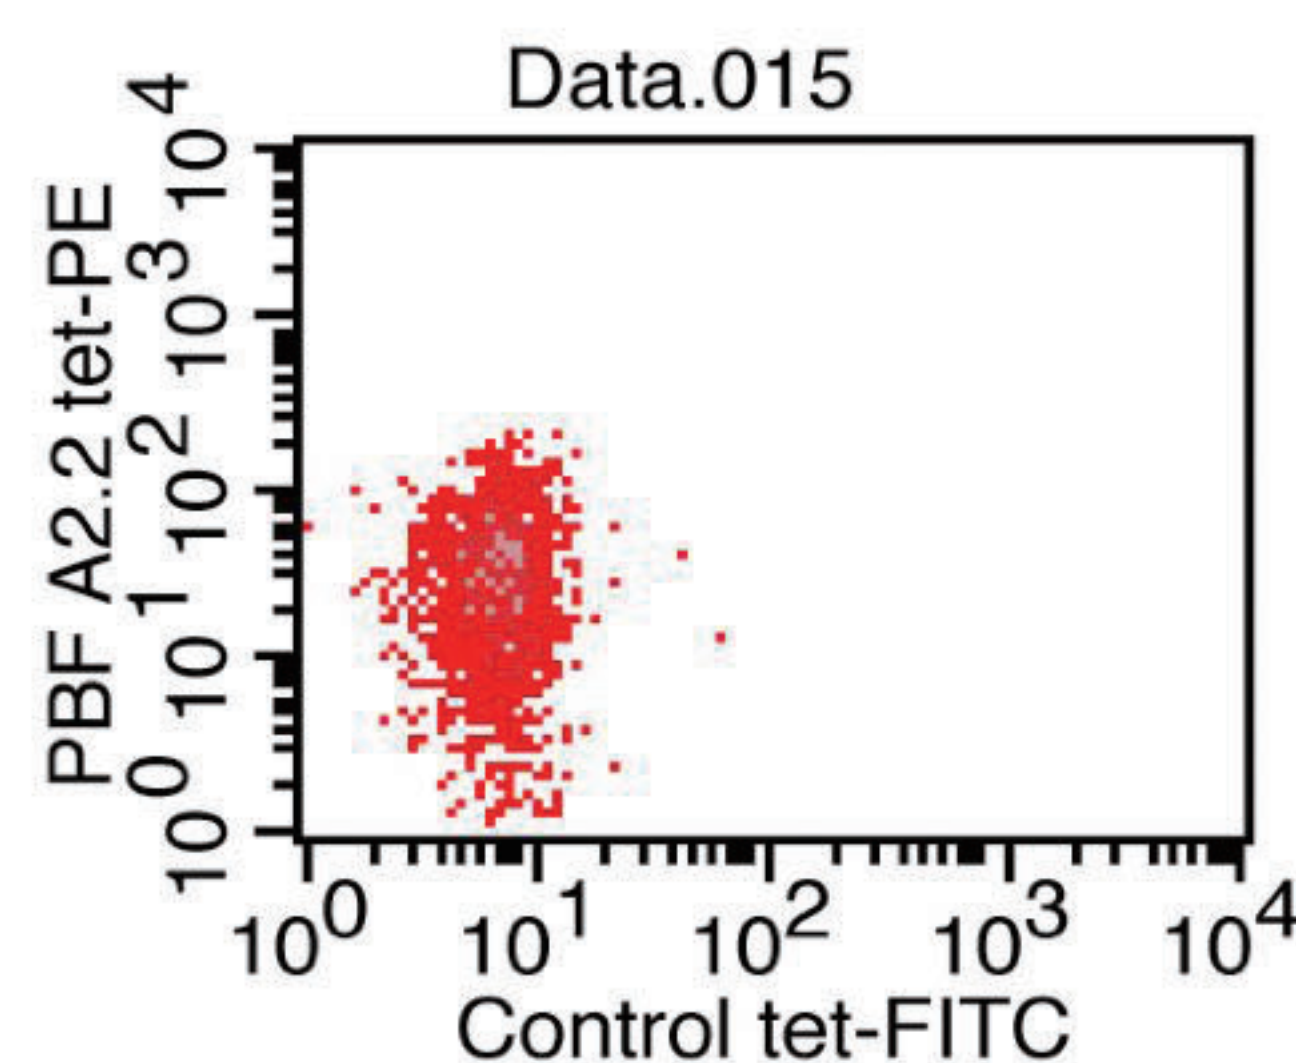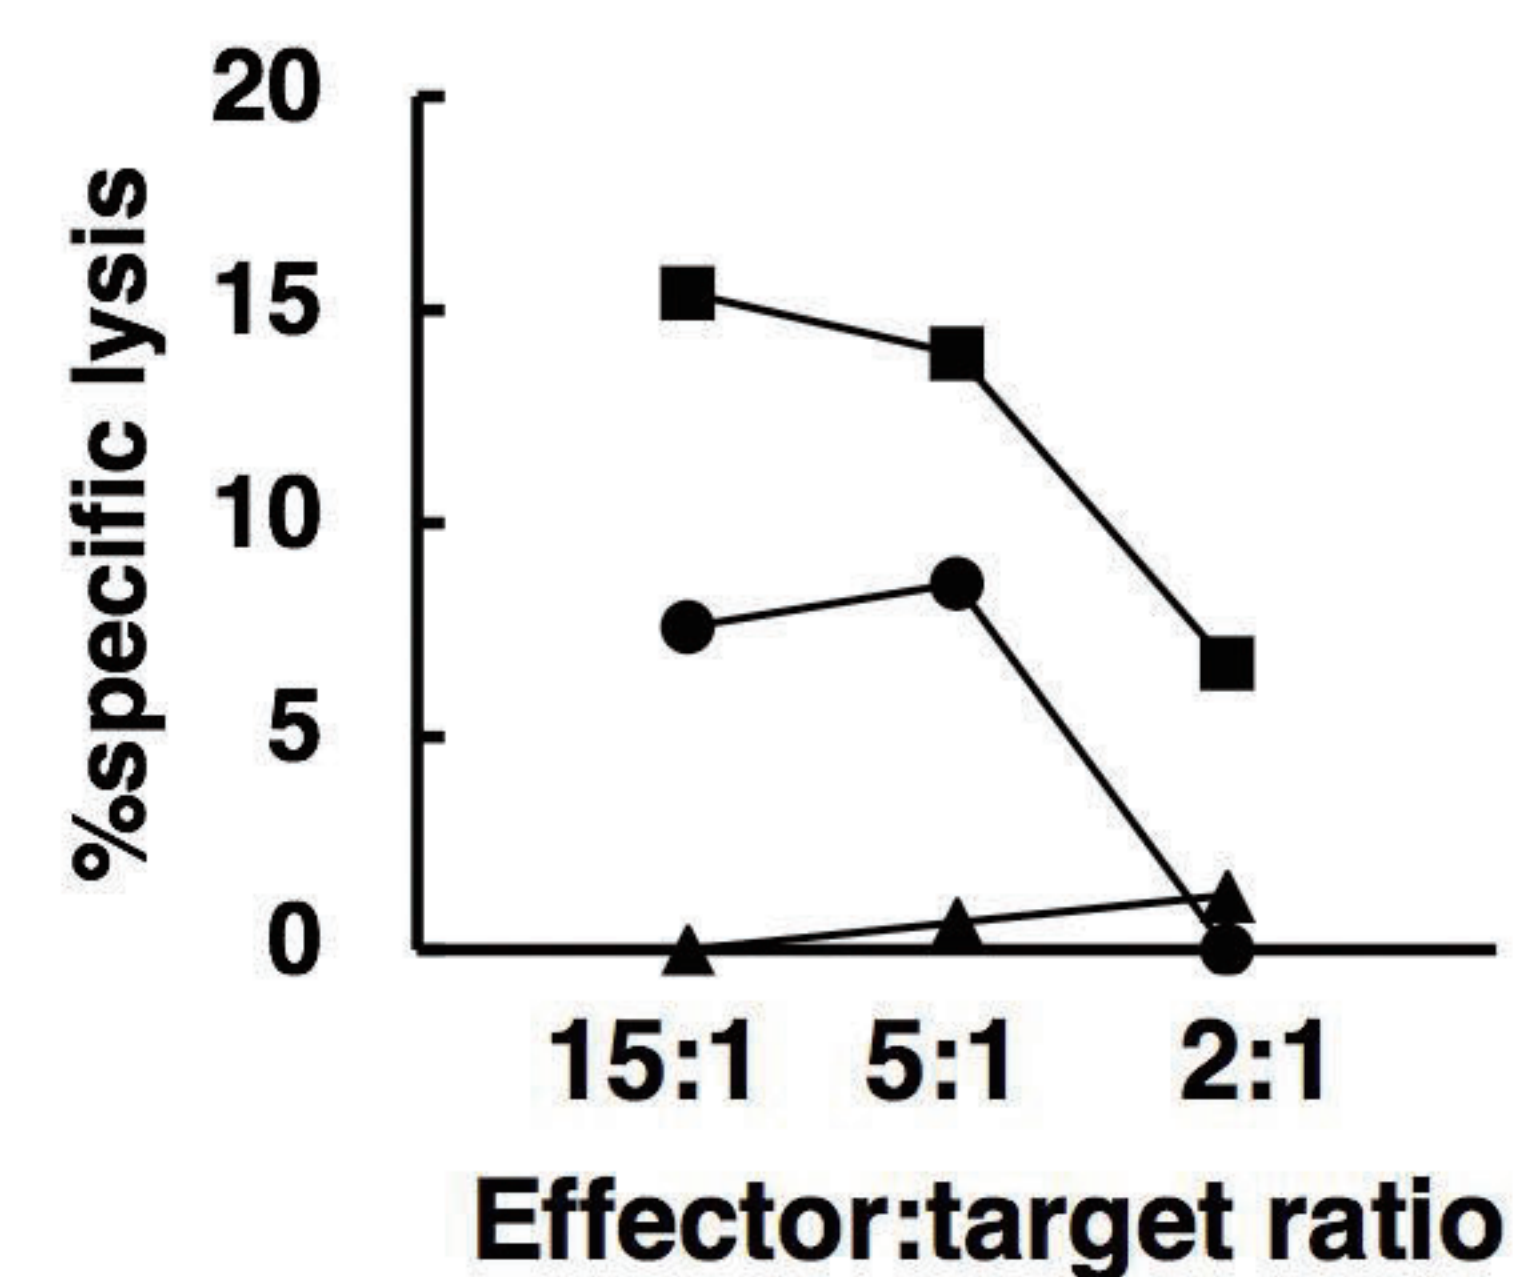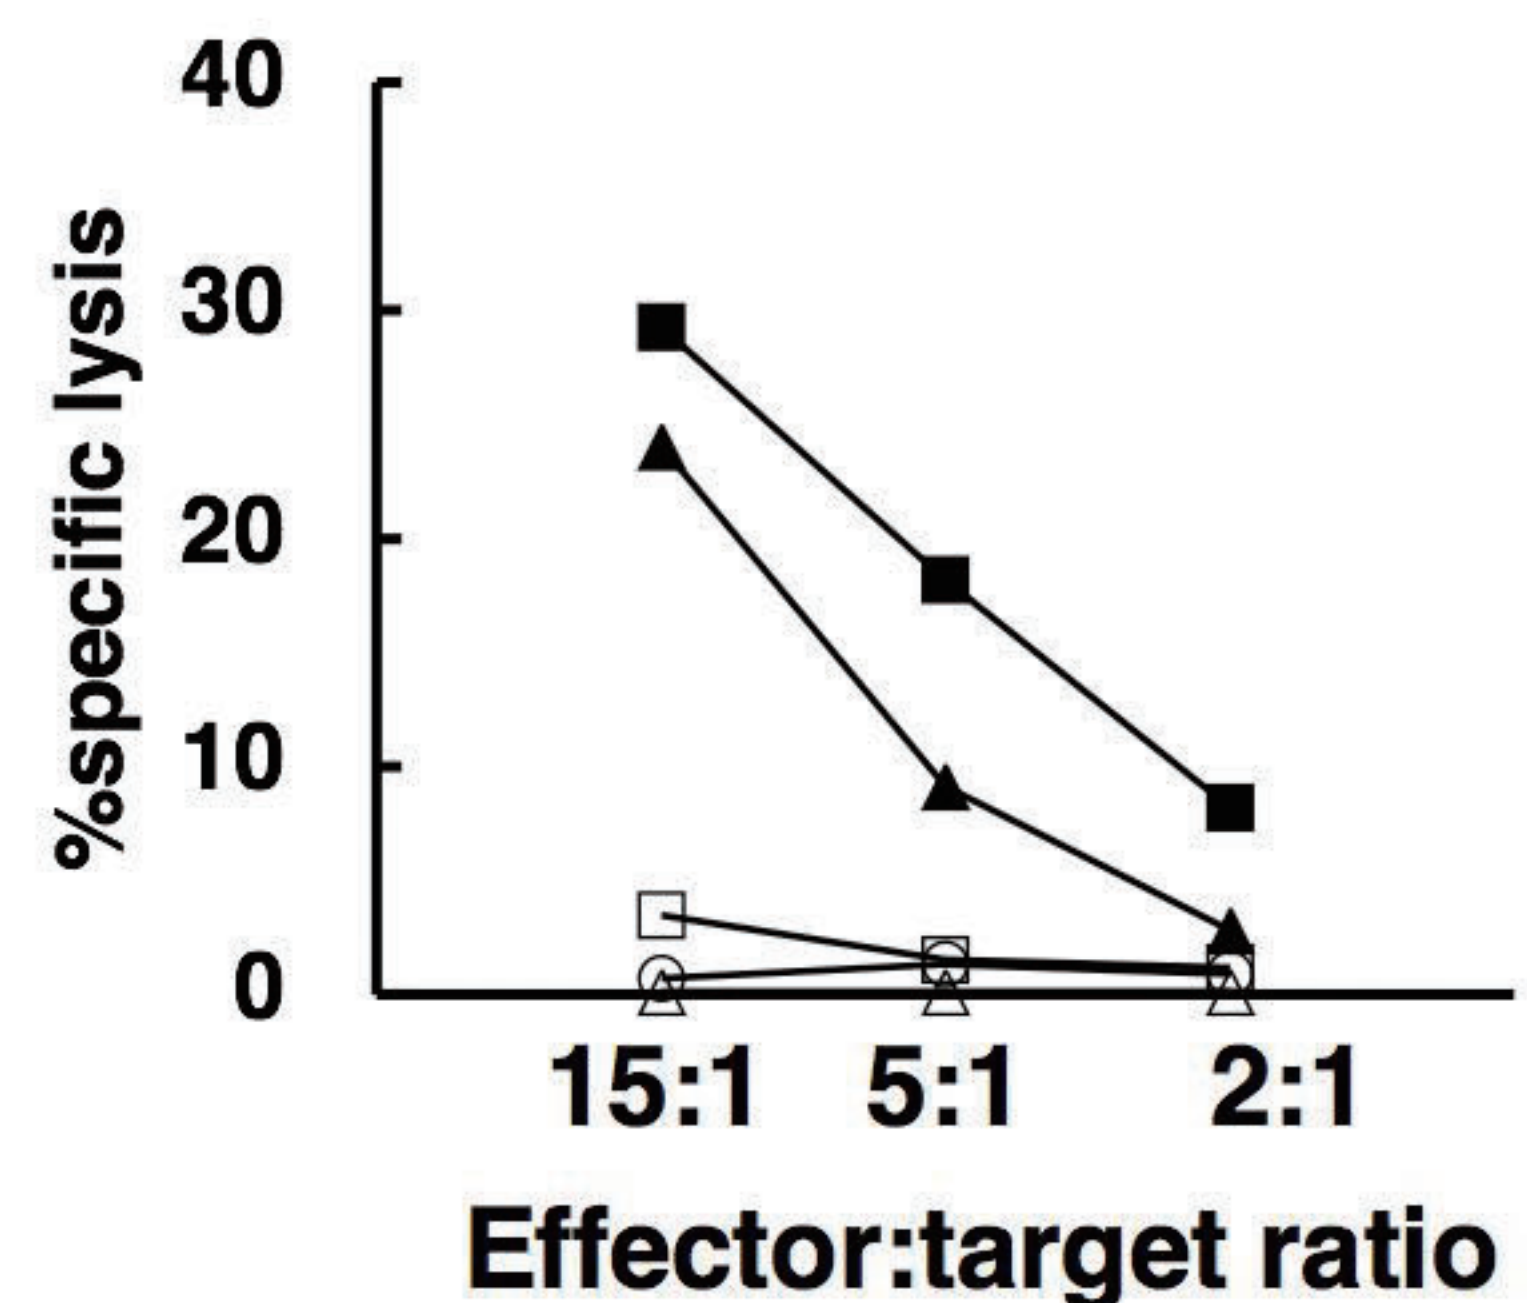

Supplement: MOESM7 [file 9576290]
